# Supplementary material
Source: PubMed Central journal article supplement (PMC5362362)

**Figure S1.** Copy-number variants (CNVs) inference from WES data, (a) flowchart showing the steps of CNV discovery, (b) a representative pathogenic CNV is shown here. This is a triplication at 22q11 as shown in (b), aCGH data of the proband and parents is depicted in (c) Rests of the pathogenic CNVs are not shown here.

(a)

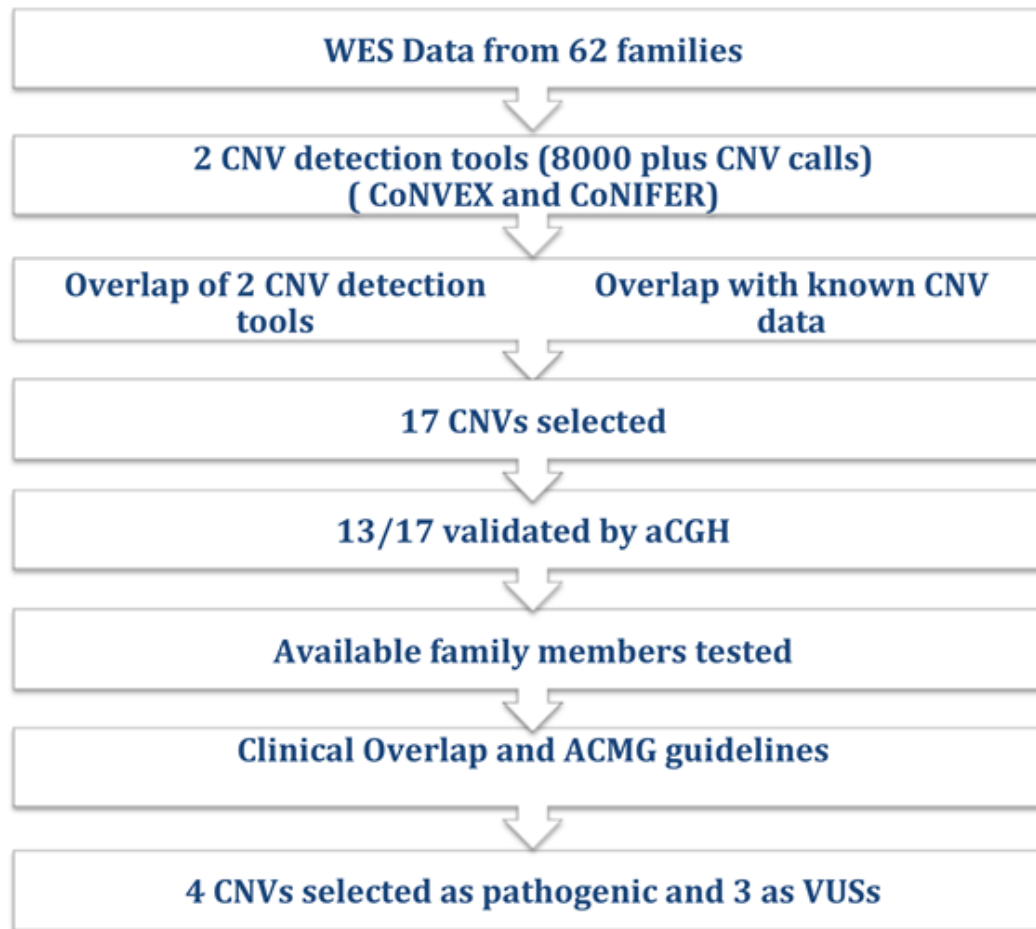

(b)

chr22: 16,448,823 - 18,659,585

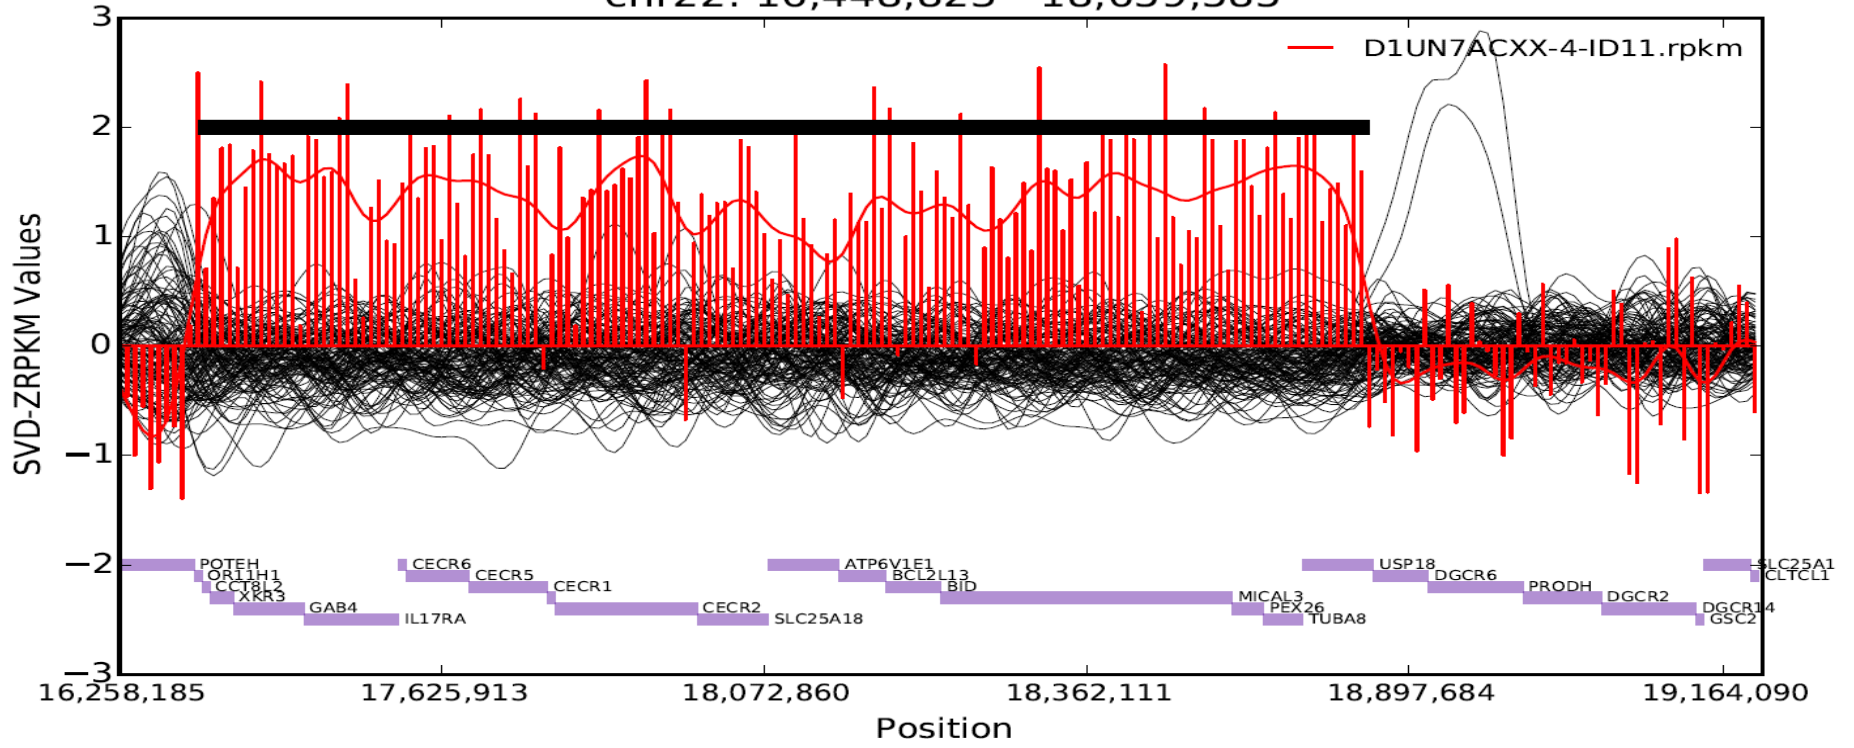

(c)

## 22q11.1q11.21 triplication

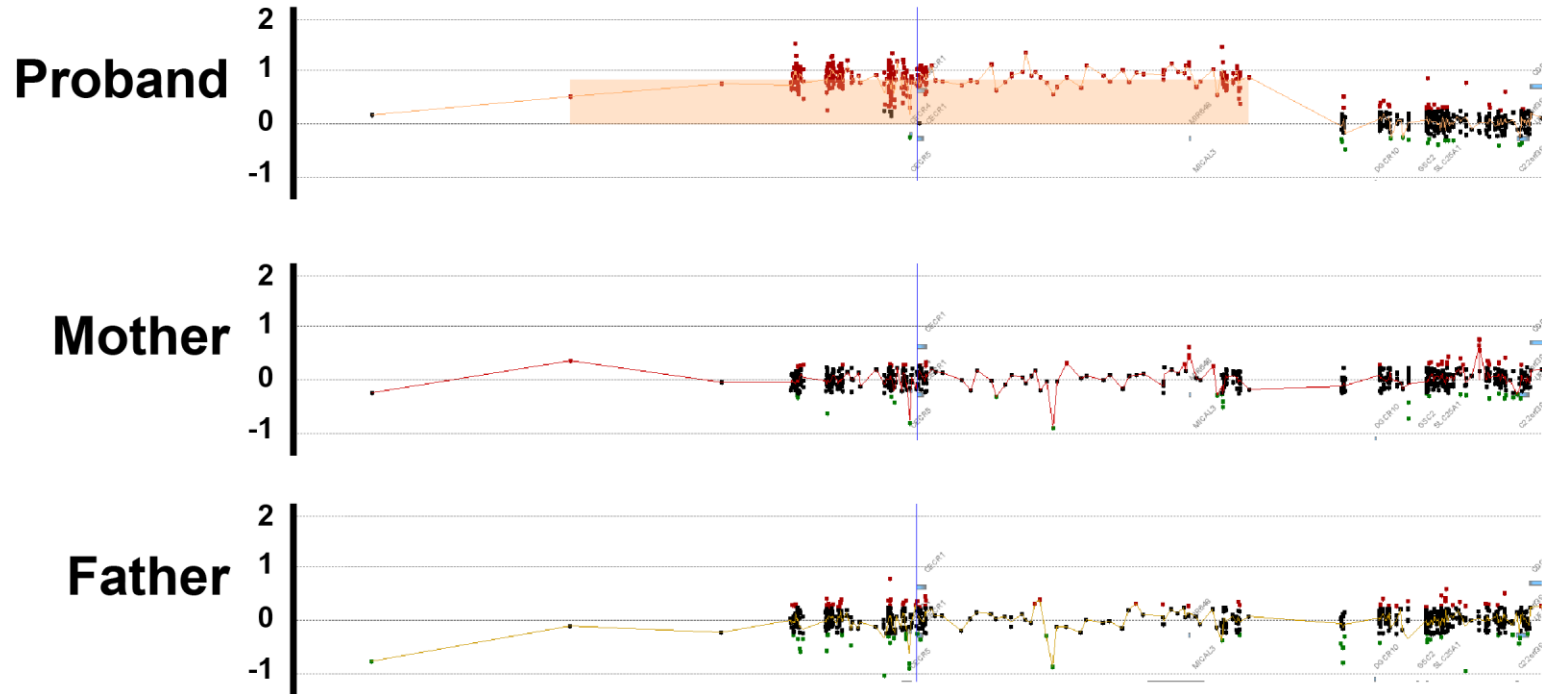

Supplement: NIHMS807719-supplement-Supplementary_Figure_S1.pdf [file NIHMS807719-supplement-Supplementary_Figure_S1.pdf]
